# Supplementary material
Source: MDPI journal article supplement (https://www.mdpi.com/2504-5377/5/2/22)
Supplement: s1 [file s1]

## **Supplementary Videos for “Driven transport of dilute polymer solutions through porous media comprised of interconnected cavities”**

The time gap between successive simulation frames is 200 timesteps. The value of the simulation timestep is 0.01. The video files titled ‘Linear.avi’, ‘Ring.avi’ and ‘Star.avi’ illustrate the motion of linear, ring and star polymers with 12 arms through the array of spherical cavities in the presence of a pressure-driven flow. In all cases, the values of  $F_e$  and  $N$  are 0.14 and 73 respectively.
